# Supplementary material
Source: HighWire-hosted journal article supplement (https://openres.ersjournals.com/content/8/2/00680-2021)
Supplement: inline-supplementary-material-1 [file inline-supplementary-material-1.pdf]

## **Online Data Supplement**

### **Expiratory flow limitation in a cohort of highly symptomatic COPD patients**

Augusta Beech <sup>1,2</sup>, Natalie Jackson<sup>2</sup>, James Dean<sup>2</sup>, Dave Singh <sup>1,2</sup>

<sup>1</sup>Division of Infection, Immunity and Respiratory Medicine, School of Biological Sciences,  
Faculty of Biology, Medicine and Health, Manchester Academic Health Science Centre, The  
University of Manchester, Manchester, UK

<sup>2</sup>Medicines Evaluation Unit, Manchester University NHS Foundation Trust, Manchester, UK

Corresponding author:

Augusta Beech

Department of Medicine and Health

University of Manchester

Education and Research Centre, M23 9LT, UK

Tel: +44 (0)161 946 4050 Fax +44 (0)1619461459

Email address: [augusta.beech@manchester.ac.uk](mailto:augusta.beech@manchester.ac.uk)

Number of supplementary tables: 3

Number of supplementary figures: 0

Word count: 227

## 1    **Methods**

### 2    **Impulse Oscillometry (IOS)**

3    Patients were required to support their cheeks and use a free-flow mouthpiece to depress the  
4    tongue while impulses were applied during tidal breathing for 30 seconds in a seated position  
5    - this process was repeated to achieve three technically acceptable and reproducible attempts  
6    of which the means were reported. IOS was performed prior to all other lung function  
7    measurements.

## 8    **Results**

### 9    **EFL and other IOS measurements at 6 months**

10    At 6 months R5 and AX were elevated in EFL<sup>High</sup> patients compared to both EFL<sup>None</sup> and  
11    EFL<sup>Intermediate</sup> (0.72 vs 0.44 and 0.56 kPa/L/s, p=0.02 and <0.0001 and 0.02. 4.48 vs 1.03 and  
12    2.12 kPa/L/s, p<0.001 and 0.04 respectively, supplementary table 3). R5-R20 was elevated in  
13    EFL<sup>High</sup> patients compared to EFL<sup>None</sup> and EFL<sup>Intermediate</sup> (0.35 vs 0.09 and 0.19 kPa/L/s,  
14    p<0.0001 for both, supplementary table 3). R5-R20 was also higher in EFL<sup>Intermediate</sup> when  
15    compared to EFL<sup>None</sup> (0.19 vs 0.09 kPa/L/s, p=0.01, supplementary table 3). Furthermore, X5  
16    was more negative in EFL<sup>High</sup> patients compared to both EFL<sup>None</sup> patients (-0.39 vs -0.17  
17    kPa/L/s, p<0.0001, supplementary table 3).

### 18    **EFL and lung volumes at 6 months**

19    At 6 months, 53 patients had technically acceptable data collected for both IOS and body  
20    plethysmography. RV/TLC ratio was significantly elevated in EFL<sup>High</sup> compared to EFL<sup>None</sup>  
21    patients (0.55 vs 0.45 respectively, p<0.01, supplementary table 3). No differences in DLCO  
22    or KCO were observed between groups.

## Tables

**Supplementary table 1.** Baseline comorbidities, n=70

| Characteristic                                        | All<br>(n=70)<br>n (%) | EFL <sup>None</sup><br>(n=24)<br>n (%) | EFL <sup>Intermediate</sup><br>(n=12)<br>n (%) | EFL <sup>High</sup><br>(n=33)<br>n (%) | P-<br>value |
|-------------------------------------------------------|------------------------|----------------------------------------|------------------------------------------------|----------------------------------------|-------------|
| <b>Patients with at least one concomitant disease</b> | 66<br>(94.3)           | 24 (100.0)                             | 11 (91.7)                                      | 31 (93.9)                              | 0.41        |
| <b>Ischaemic heart disease</b>                        | 18<br>(25.7)           | 8 (33.3)                               | 3 (25.0)                                       | 7 (21.2)                               | 0.59        |
| <b>Myocardial ischaemia</b>                           | 13<br>(18.6)           | 4 (16.7)                               | 2 (16.7)                                       | 7 (21.2)                               | 0.89        |
| <b>Angina pectoris</b>                                | 7 (10.0)               | 4 (16.7)                               | 0                                              | 3 (9.1)                                | 0.28        |
| <b>Myocardial infarction</b>                          | 10<br>(14.3)           | 5 (20.8)                               | 2 (16.7)                                       | 3 (9.1)                                | 0.45        |
| <b>Cardiac failure</b>                                | 0                      | 0                                      | 0                                              | 0                                      | N/A         |
| <b>Cardiovascular disease</b>                         | 52<br>(74.3)           | 16 (66.7)                              | 10 (83.3)                                      | 25 (75.8)                              | 0.53        |
| <b>Hypertension</b>                                   | 32<br>(45.7)           | 6 (25.0)                               | <sup>b</sup> 8 (66.7)                          | <sup>a</sup> 17 (51.5)                 | 0.04        |
| <b>Hypercholesterolemia</b>                           | 38<br>(52.3)           | 13 (54.2)                              | 6 (50.0)                                       | 18 (54.5)                              | 0.96        |
| <b>Coronary artery disease</b>                        | 0                      | 0                                      | 0                                              | 0                                      | N/A         |
| <b>Pulmonary hypertension</b>                         | 0                      | 0                                      | 0                                              | 0                                      | N/A         |
| <b>Peripheral vascular disease</b>                    | 5 (7.1)                | 4 (16.7)                               | 1 (8.3)                                        | 0                                      | 0.06        |
| <b>Cerebrovascular disease</b>                        | 0                      | 0                                      | 0                                              | 0                                      | N/A         |
| <b>Stroke (including transient ischaemic attack)</b>  | 9 (12.9)               | 2 (8.3)                                | 3 (25.0)                                       | 4 (12.1)                               | 0.37        |
| <b>Irregular heartbeat</b>                            | 3 (4.3)                | 1 (4.2)                                | 0                                              | 2 (6.1)                                | 0.68        |
| <b>Diabetes</b>                                       | 8 (11.4)               | 1 (4.2)                                | 3 (25.0)                                       | 4 (12.1)                               | 0.09        |
| <b>Obesity</b>                                        | 23<br>(32.9)           | 4 (16.7)                               | 5 (41.7)                                       | 14 (42.4)                              | 0.10        |
| <b>Obstructive sleep apnoea</b>                       | 1 (1.4)                | 0                                      | 0                                              | 1 (3.0)                                | 0.57        |
| <b>Anaemia</b>                                        | 4 (5.7)                | 3 (12.5)                               | 0                                              | 1 (3.0)                                | 0.20        |
| <b>Osteoarthritis, osteopenia or</b>                  | 27                     | 9 (37.5)                               | 3 (25.0)                                       | 14 (42.4)                              | 0.57        |

|                                          |              |          |          |           |      |
|------------------------------------------|--------------|----------|----------|-----------|------|
| <b>osteoporosis</b>                      | (38.6)       |          |          |           |      |
| <b>Gastro-oesophageal reflux disease</b> | 17<br>(24.3) | 6 (25.0) | 2 (16.7) | 9 (27.3)  | 0.77 |
| <b>Psychological disturbances</b>        | 23<br>(32.9) | 8 (33.3) | 5 (41.7) | 10 (30.3) | 0.79 |
| <b>Depression</b>                        | 19<br>(27.1) | 7 (29.2) | 4 (33.3) | 8 (24.2)  | 0.81 |
| <b>Anxiety</b>                           | 9 (12.9)     | 3 (12.5) | 2 (16.7) | 4 (12.1)  | 0.92 |
| <b>Insomnia</b>                          | 1 (1.4)      | 0        | 1 (8.3)  | 0         | 0.09 |

---

Data presented as n (%). p-value corresponds to a chi-squared test. EFL defined as EFL<sup>High</sup> ( $\Delta X5 \geq 0.28$  kPa/L/s), EFL<sup>Intermediate</sup> ( $\Delta X5$  0.10-0.27 kPa/L/s) and  $\geq$  EFL<sup>None</sup> ( $\Delta X5 < 0.10$  kPa/L/s).

<sup>a</sup> = p<0.05 (using Tukey's or Dunns post-hoc test) for EFL<sup>None</sup> vs EFL<sup>High</sup>

<sup>b</sup> = p<0.05 (using Tukey's or Dunns post-hoc test) for EFL<sup>None</sup> vs EFL<sup>Intermediate</sup>

**Supplementary table 2.** Summary of patients that were lost to follow-up between baseline and 6 month visits (n=15)

| <b>Reason for loss of follow up</b>                           | <b>Number of patients,<br/>n (%)</b> |
|---------------------------------------------------------------|--------------------------------------|
| Not contactable                                               | 10 (66.6)                            |
| Unable to produce technically acceptable oscillometry results | 1 (6.7)                              |
| Withdrawn due to a change in medical circumstances            | 4 (26.7)                             |

**Supplementary table 3.** 6 month characteristics in different EFL groups, n=54<sup>a</sup>

| Characteristic                       | EFL <sup>None</sup> (n=24) | EFL <sup>Intermediate</sup> (n=11)         | EFL <sup>High</sup> (n=19)                                             | ANOVA<br>p-value |
|--------------------------------------|----------------------------|--------------------------------------------|------------------------------------------------------------------------|------------------|
| Post-BD FEV1 (% predicted)           | 74.8 (68.9-80.7)           | 64.7 (51.9-77.5)                           | <sup>b</sup> <sup>b</sup> 54.4 (46.3-62.5)                             | <0.01            |
| Post-BD FEV1 (L)                     | 2.0 (1.8-2.2)              | 1.7 (1.3-2.1)                              | <sup>b</sup> <sup>b</sup> 1.4 (1.1-1.6)                                | <0.01            |
| Post-BD FVC (% predicted)            | 102.7 (92.3-114.1)         | 99.8 (87.0-112.5)                          | 95.0 (84.0-106.1)                                                      | 0.60             |
| Post-BD FVC (L)                      | 3.4 (2.9-3.9)              | 3.3 (2.7-3.9)                              | 3.1 (2.7-3.6)                                                          | 0.66             |
| FEV <sub>1</sub> reversibility (%)   | 10.0 (6.6-13.3)            | 11.9 (5.3-18.4)                            | 17.6 (9.2-26.0)                                                        | 0.14             |
| FEV <sub>1</sub> reversibility (mls) | 165.8 (112.4-219.3)        | 159.1 (90.8-227.4)                         | 194.2 (110.0-278.4)                                                    | 0.75             |
| FEV <sub>1</sub> /FVC ratio (%)      | 54.5 (48.3-60.6)           | 52.4 (45.5-59.3)                           | <sup>b</sup> 43.8 (37.5-50.2)                                          | 0.04             |
| R5 (kPa/L/s)                         | 0.44 (0.39-0.49)           | 0.56 (0.47-0.65)                           | <sup>b</sup> <sup>b</sup> , <sup>d</sup> 0.72 (0.63-0.81)              | <0.01            |
| R20 (kPa/L/s)                        | 0.36 (0.32-0.40)           | 0.37 (0.31-0.44)                           | 0.38 (0.33-0.42)                                                       | 0.77             |
| R5-R20 (kPa/L/s)                     | 0.09 (0.06-0.11)           | <sup>c</sup> 0.19 (0.15-0.22)              | <sup>b</sup> <sup>b</sup> , <sup>d</sup> <sup>d</sup> 0.35 (0.28-0.41) | <0.01            |
| AX                                   | 1.03 [0.10-2.64]           | <sup>c</sup> 2.12 [0.62-4.22]              | <sup>b</sup> <sup>b</sup> , <sup>d</sup> 4.48 [1.76-11.69]             | <0.01            |
| X5 (kPa/L/s)                         | -0.17 [-0.27-(-0.07)]      | -0.24 [-0.41-(-0.11)]                      | <sup>b</sup> <sup>b</sup> -0.39 (-1.00(-0.07))                         | <0.01            |
| ΔX5 (kPa/L/s)                        | 0.01 [-0.07-0.09]          | <sup>c</sup> <sup>c</sup> 0.18 [0.11-0.25] | <sup>b</sup> <sup>b</sup> 0.57 [0.29-1.55]                             | <0.01            |
| TLC (L)                              | 6.16 (5.56-6.76)           | 5.99 (5.08-6.90)                           | 6.25 (5.58-6.91)                                                       | 0.89             |
| TLC (% predicted)                    | 103.00 (77.32-136.8)       | 98.26 (65.05-130.08)                       | 99.85 (74.63-149.00)                                                   | 0.64             |
| FRC (L)                              | 3.43 [2.06-7.79]           | 3.78 [2.24-5.23]                           | 4.25 [1.96-6.41]                                                       | 0.11             |
| FRC (% predicted)                    | 109.30 [74.00-196.80]      | 124.80 [69.14-160.60]                      | 133.60 [69.00-266.00]                                                  | 0.08             |
| RV(L)                                | 2.61 [1.62-5.81]           | 3.08 [1.92-4.34]                           | 3.61 [1.49-5.59]                                                       | 0.08             |
| RV (% predicted)                     | 121.10 [68.00-213.00]      | 127.50 [92.00-106.80]                      | 146.60 [68.00-265.00]                                                  | 0.10             |
| RV:TLC                               | 0.45 [0.31-0.61]           | 0.49 [0.35-0.73]                           | <sup>b</sup> 0.55 [0.34-0.69]                                          | 0.03             |
| DLCO (mmol/min/kPa)                  | 4.50 [1.80-9.80]           | 3.90 [2.80-7.0]                            | 4.0 [2.0-6.90]                                                         | 0.67             |
| DLCO (% predicted)                   | 55.0 [25.0-92.0]           | 42.0 [34.0-90.0]                           | 48.0 [31.0-86.3]                                                       | 0.48             |
| KCO (mmol/min/kPa/L)                 | 0.96 [0.00-1.50]           | 0.95 [0.53-1.54]                           | 0.85 [0.47-1.44]                                                       | 0.86             |
| KCO (% predicted)                    | 64.86 [54.31-75.41]        | 71.39 [55.10-87.68]                        | 68.72 [58.00-79.45]                                                    | 0.73             |
| VA (L)                               | 4.61 [3.95-5.27]           | 4.51 [3.62-5.40]                           | 4.41 [3.94-4.87]                                                       | 0.88             |

|                         |                  |                   |                  |      |
|-------------------------|------------------|-------------------|------------------|------|
| <b>VA (% predicted)</b> | 81.0 [0.0-103.0] | 76.0 [58.0-106.0] | 76.0 [54.0-96.0] | 0.40 |
|-------------------------|------------------|-------------------|------------------|------|

Data presented as mean (95% CI), median [range] or percentage as appropriate. p-value corresponds to one way ANOVA, Kruskal-wallis or chi-squared test as appropriate. EFL defined as EFL<sup>High</sup> ( $\Delta X5 \geq 0.28$  kPa/L/s), EFL<sup>Intermediate</sup> ( $\Delta X5$  0.10-0.27 kPa/L/s) and EFL<sup>None</sup> ( $\Delta X5 < 0.10$  kPa/L/s).

<sup>a</sup> 1 patient did not produce technically acceptable results for lung volumes or spirometry

<sup>b</sup> = p<0.05, <sup>b b</sup> = p<0.01 (using Tukey's or Dunns post-hoc test) for EFL<sup>None</sup> vs EFL<sup>High</sup>

<sup>c</sup> = p<0.05, <sup>c c</sup> = p<0.01 (using Tukey's or Dunns post-hoc test) for EFL<sup>None</sup> vs EFL<sup>Intermediate</sup>

<sup>d</sup> = p<0.05, <sup>d d</sup> = p<0.01 (using Tukey's or Dunns post-hoc test) for EFL<sup>Intermediate</sup> vs EFL<sup>High</sup>

Abbreviations: AX, reactance area; BD, bronchodilator; DLCO, diffusing capacity for carbon monoxide; FEV1, forced expiratory volume in 1 second; FRC, functional residual capacity; FVC, forced vital capacity; KCO, carbon monoxide transfer coefficient; RV, residual volume; R5, resistance at 5Hz; R20, resistance at 20Hz; TLC, total lung capacity; VA, alveolar volume; X5, reactance at 5Hz,  $\Delta X5$ , difference in total reactance between inspiration and expiration;
